# Supplementary material for: Lung Cancer Management with Silibinin: A Historical and Translational Perspective
Source: MDPI journal article supplement (doi:10.3390/ph14060559), 2021-06-11
Supplement: s1 [file s1]

**Figure S1.** (a) Original uncropped immunoblots for Figure 2. (b) Original raw data of the phenotypic microarray system analyzed in Figure 2.

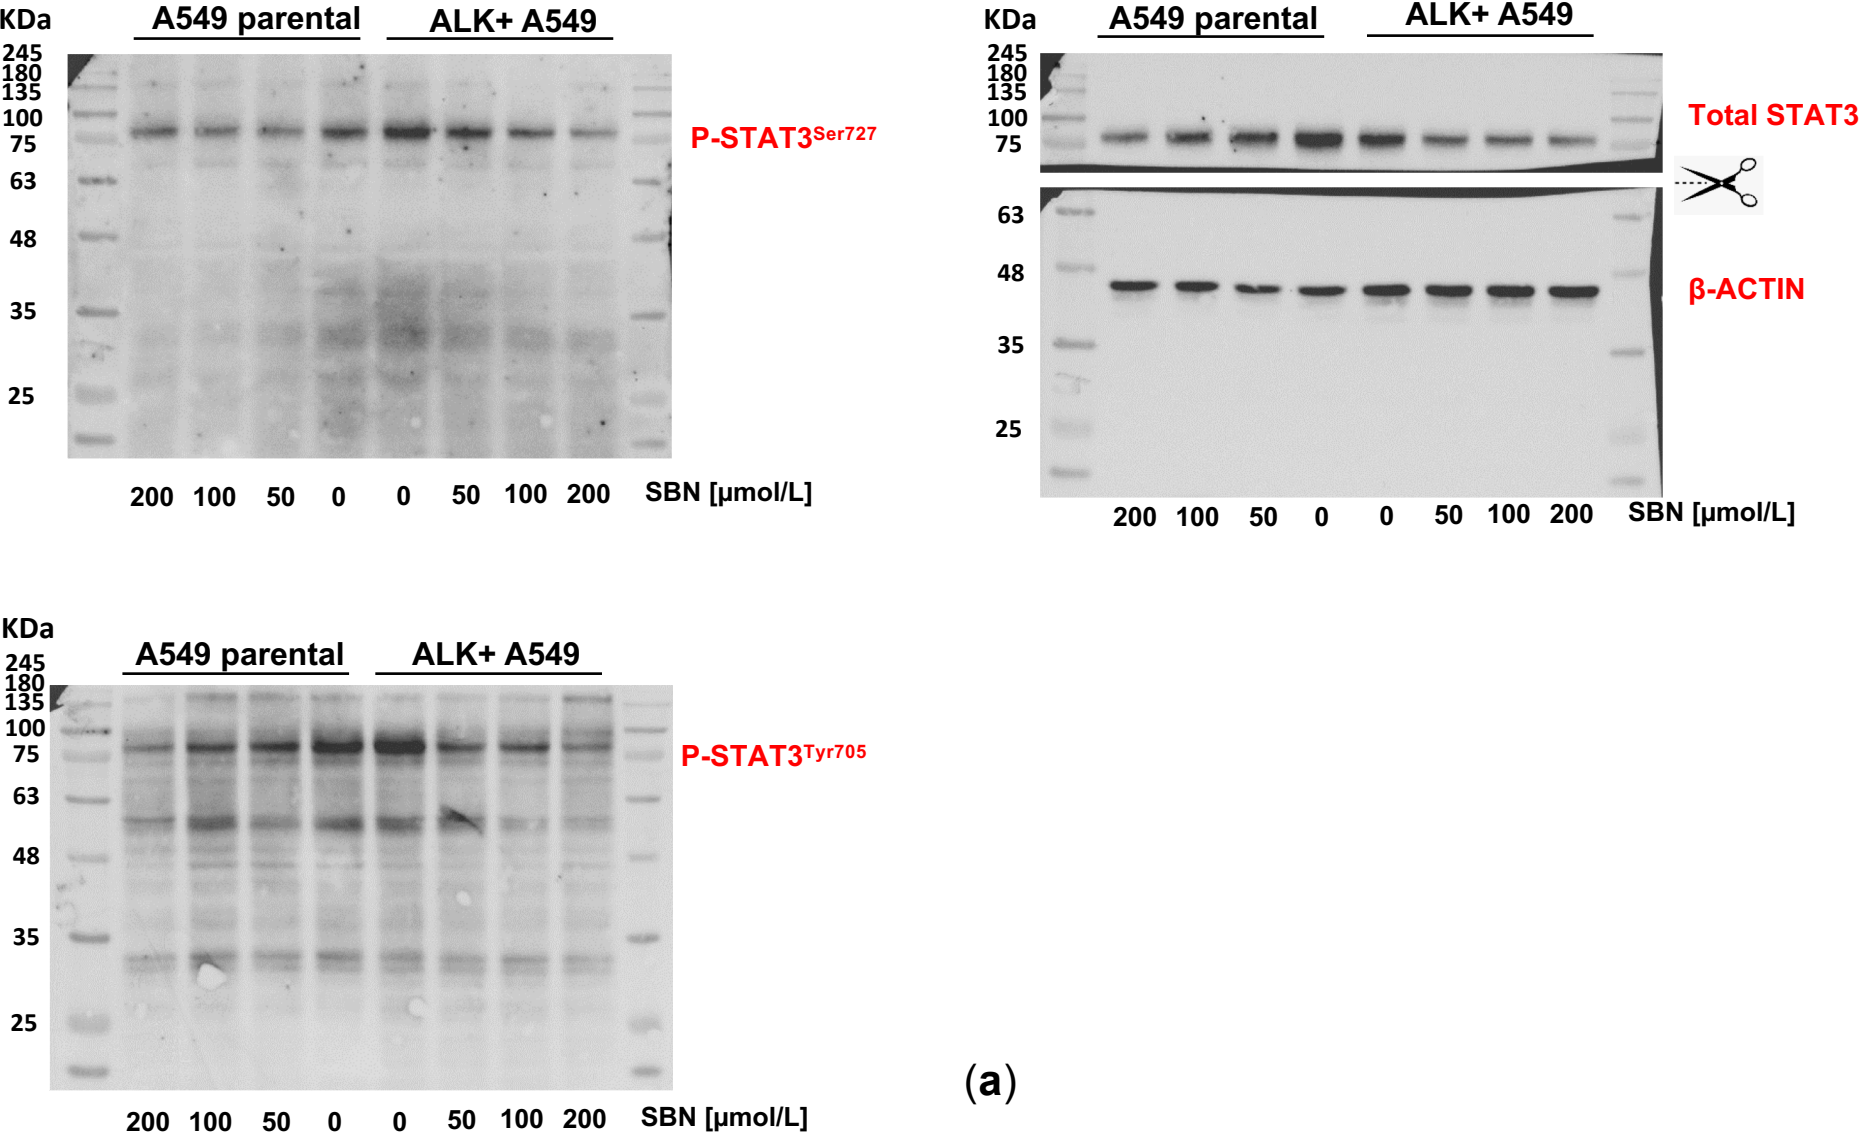

(b)

| M11                          | PAR       | SBN | PAR | ALK | ALK | SBN |
|------------------------------|-----------|-----|-----|-----|-----|-----|
| Negative Control 1           |           |     |     |     |     |     |
| Negative Control 2           |           |     |     |     |     |     |
| Negative Control 3           |           |     |     |     |     |     |
| Negative Control 4           |           |     |     |     |     |     |
| Solasodine 1                 |           |     |     |     |     |     |
| Solasodine 2                 |           |     |     |     |     |     |
| Solasodine 3                 |           |     |     |     |     |     |
| Solasodine 4                 |           |     |     |     |     |     |
| Rotenone 1                   | 0.6203673 |     |     |     |     |     |
| Rotenone 2                   |           |     |     |     |     |     |
| Rotenone 3                   | 0.7071205 |     |     |     |     |     |
| Rotenone 4                   | 0.6510572 |     |     |     |     |     |
| Aklavine Hydrochloride 1     | 0.4168876 |     |     |     |     |     |
| Aklavine Hydrochloride 2     | 0.7948967 |     |     |     |     |     |
| Aklavine Hydrochloride 3     | 1.3096431 |     |     |     |     |     |
| Aklavine Hydrochloride 4     |           |     |     |     |     |     |
| Deguelin (-) 1               |           |     |     |     |     |     |
| Deguelin (-) 2               |           |     |     |     |     |     |
| Deguelin (-) 3               |           |     |     |     |     |     |
| Deguelin (-) 4               |           |     |     |     |     |     |
| Celastrol 1                  |           |     |     |     |     |     |
| Celastrol 2                  |           |     |     |     |     |     |
| Celastrol 3                  |           |     |     |     |     |     |
| Celastrol 4                  |           |     |     |     |     |     |
| Juglone 1                    |           |     |     |     |     |     |
| Juglone 2                    |           |     |     |     |     |     |
| Juglone 3                    |           |     |     |     |     |     |
| Juglone 4                    |           |     |     |     |     |     |
| Sanguinarine Sulfate 1       |           |     |     |     |     |     |
| Sanguinarine Sulfate 2       |           |     |     |     |     |     |
| Sanguinarine Sulfate 3       | 1.8401810 |     |     |     |     |     |
| Sanguinarine Sulfate 4       |           |     |     |     |     |     |
| Actinomycin D 1              |           |     |     |     |     |     |
| Actinomycin D 2              |           |     |     |     |     |     |
| Actinomycin D 3              |           |     |     |     |     |     |
| Actinomycin D 4              |           |     |     |     |     |     |
| Methylmethane Sulfonate 1    |           |     |     |     |     |     |
| Methylmethane Sulfonate 2    |           |     |     |     |     |     |
| Methylmethane Sulfonate 3    |           |     |     |     |     |     |
| Methylmethane Sulfonate 4    |           |     |     |     |     |     |
| Azathioprine 1               |           |     |     |     |     |     |
| Azathioprine 2               |           |     |     |     |     |     |
| Azathioprine 3               |           |     |     |     |     |     |
| Azathioprine 4               |           |     |     |     |     |     |
| Busulfan 1                   |           |     |     |     |     |     |
| Busulfan 2                   |           |     |     |     |     |     |
| Busulfan 3                   |           |     |     |     |     |     |
| Busulfan 4                   |           |     |     |     |     |     |
| Adarubicin 1                 |           |     |     |     |     |     |
| Adarubicin 2                 |           |     |     |     |     |     |
| Adarubicin 3                 |           |     |     |     |     |     |
| Adarubicin 4                 |           |     |     |     |     |     |
| Chloramphenicol 1            |           |     |     |     |     |     |
| Chloramphenicol 2            |           |     |     |     |     |     |
| Chloramphenicol 3            |           |     |     |     |     |     |
| Chloramphenicol 4            |           |     |     |     |     |     |
| Chloroquine Diphosphate 1    |           |     |     |     |     |     |
| Chloroquine Diphosphate 2    |           |     |     |     |     |     |
| Chloroquine Diphosphate 3    |           |     |     |     |     |     |
| Chloroquine Diphosphate 4    |           |     |     |     |     |     |
| Cyclophosphamide 1           |           |     |     |     |     |     |
| Cyclophosphamide 2           |           |     |     |     |     |     |
| Cyclophosphamide 3           |           |     |     |     |     |     |
| Cyclophosphamide 4           |           |     |     |     |     |     |
| Diethylcarbamazine Citrate 1 |           |     |     |     |     |     |
| Diethylcarbamazine Citrate 2 |           |     |     |     |     |     |
| Diethylcarbamazine Citrate 3 |           |     |     |     |     |     |
| Diethylcarbamazine Citrate 4 |           |     |     |     |     |     |
| Emetine 1                    |           |     |     |     |     |     |
| Emetine 2                    |           |     |     |     |     |     |
| Emetine 3                    |           |     |     |     |     |     |
| Emetine 4                    |           |     |     |     |     |     |
| Fluorouracil 1               |           |     |     |     |     |     |
| Fluorouracil 2               |           |     |     |     |     |     |
| Fluorouracil 3               |           |     |     |     |     |     |
| Fluorouracil 4               |           |     |     |     |     |     |
| Hydroxyurea 1                |           |     |     |     |     |     |
| Hydroxyurea 2                |           |     |     |     |     |     |
| Hydroxyurea 3                |           |     |     |     |     |     |
| Hydroxyurea 4                |           |     |     |     |     |     |
| Mechlorethamine 1            |           |     |     |     |     |     |
| Mechlorethamine 2            |           |     |     |     |     |     |
| Mechlorethamine 3            |           |     |     |     |     |     |
| Mechlorethamine 4            |           |     |     |     |     |     |
| Mercaptopurine 1             |           |     |     |     |     |     |
| Mercaptopurine 2             |           |     |     |     |     |     |
| Mercaptopurine 3             |           |     |     |     |     |     |
| Mercaptopurine 4             |           |     |     |     |     |     |
| Quinacrine Hydrochloride 1   |           |     |     |     |     |     |
| Quinacrine Hydrochloride 2   |           |     |     |     |     |     |
| Quinacrine Hydrochloride 3   |           |     |     |     |     |     |
| Quinacrine Hydrochloride 4   |           |     |     |     |     |     |
| Streptozotisin 1             |           |     |     |     |     |     |
| Streptozotisin 2             |           |     |     |     |     |     |
| Streptozotisin 3             |           |     |     |     |     |     |
| Streptozotisin 4             |           |     |     |     |     |     |

| M12                             | PAR | SBN | PAR | ALK | ALK | SBN |
|---------------------------------|-----|-----|-----|-----|-----|-----|
| Negative Control 1              |     |     |     |     |     |     |
| Negative Control 2              |     |     |     |     |     |     |
| Negative Control 3              |     |     |     |     |     |     |
| Negative Control 4              |     |     |     |     |     |     |
| Tamoxifen Citrate 1             |     |     |     |     |     |     |
| Tamoxifen Citrate 2             |     |     |     |     |     |     |
| Tamoxifen Citrate 3             |     |     |     |     |     |     |
| Tamoxifen Citrate 4             |     |     |     |     |     |     |
| Thioguanine 1                   |     |     |     |     |     |     |
| Thioguanine 2                   |     |     |     |     |     |     |
| Thioguanine 3                   |     |     |     |     |     |     |
| Thioguanine 4                   |     |     |     |     |     |     |
| Acridavium Hydrochloride 1      |     |     |     |     |     |     |
| Acridavium Hydrochloride 2      |     |     |     |     |     |     |
| Acridavium Hydrochloride 3      |     |     |     |     |     |     |
| Acridavium Hydrochloride 4      |     |     |     |     |     |     |
| Pentamidine Isethionate 1       |     |     |     |     |     |     |
| Pentamidine Isethionate 2       |     |     |     |     |     |     |
| Pentamidine Isethionate 3       |     |     |     |     |     |     |
| Pentamidine Isethionate 4       |     |     |     |     |     |     |
| Mycophenolic Acid 1             |     |     |     |     |     |     |
| Mycophenolic Acid 2             |     |     |     |     |     |     |
| Mycophenolic Acid 3             |     |     |     |     |     |     |
| Mycophenolic Acid 4             |     |     |     |     |     |     |
| Aminopterin 1                   |     |     |     |     |     |     |
| Aminopterin 2                   |     |     |     |     |     |     |
| Aminopterin 3                   |     |     |     |     |     |     |
| Aminopterin 4                   |     |     |     |     |     |     |
| Berberine Chloride 1            |     |     |     |     |     |     |
| Berberine Chloride 2            |     |     |     |     |     |     |
| Berberine Chloride 3            |     |     |     |     |     |     |
| Berberine Chloride 4            |     |     |     |     |     |     |
| Emodin 1                        |     |     |     |     |     |     |
| Emodin 2                        |     |     |     |     |     |     |
| Emodin 3                        |     |     |     |     |     |     |
| Emodin 4                        |     |     |     |     |     |     |
| Puromycin Hydrochloride 1       |     |     |     |     |     |     |
| Puromycin Hydrochloride 2       |     |     |     |     |     |     |
| Puromycin Hydrochloride 3       |     |     |     |     |     |     |
| Puromycin Hydrochloride 4       |     |     |     |     |     |     |
| Nerifolin 1                     |     |     |     |     |     |     |
| Nerifolin 2                     |     |     |     |     |     |     |
| Nerifolin 3                     |     |     |     |     |     |     |
| Nerifolin 4                     |     |     |     |     |     |     |
| 5-Fluoro-5'-Deoxyuridine 1      |     |     |     |     |     |     |
| 5-Fluoro-5'-Deoxyuridine 2      |     |     |     |     |     |     |
| 5-Fluoro-5'-Deoxyuridine 3      |     |     |     |     |     |     |
| 5-Fluoro-5'-Deoxyuridine 4      |     |     |     |     |     |     |
| Carboplatin 1                   |     |     |     |     |     |     |
| Carboplatin 2                   |     |     |     |     |     |     |
| Carboplatin 3                   |     |     |     |     |     |     |
| Carboplatin 4                   |     |     |     |     |     |     |
| Cisplatin 1                     |     |     |     |     |     |     |
| Cisplatin 2                     |     |     |     |     |     |     |
| Cisplatin 3                     |     |     |     |     |     |     |
| Cisplatin 4                     |     |     |     |     |     |     |
| Zidovudine (AZT) 1              |     |     |     |     |     |     |
| Zidovudine (AZT) 2              |     |     |     |     |     |     |
| Zidovudine (AZT) 3              |     |     |     |     |     |     |
| Zidovudine (AZT) 4              |     |     |     |     |     |     |
| Azacytidine 1                   |     |     |     |     |     |     |
| Azacytidine 2                   |     |     |     |     |     |     |
| Azacytidine 3                   |     |     |     |     |     |     |
| Azacytidine 4                   |     |     |     |     |     |     |
| Cycloheximide 1                 |     |     |     |     |     |     |
| Cycloheximide 2                 |     |     |     |     |     |     |
| Cycloheximide 3                 |     |     |     |     |     |     |
| Cycloheximide 4                 |     |     |     |     |     |     |
| Azaserine 1                     |     |     |     |     |     |     |
| Azaserine 2                     |     |     |     |     |     |     |
| Azaserine 3                     |     |     |     |     |     |     |
| Azaserine 4                     |     |     |     |     |     |     |
| p-Fluorophenylalanine 1         |     |     |     |     |     |     |
| p-Fluorophenylalanine 2         |     |     |     |     |     |     |
| p-Fluorophenylalanine 3         |     |     |     |     |     |     |
| p-Fluorophenylalanine 4         |     |     |     |     |     |     |
| nethyllidrazine Hydrochloride 1 |     |     |     |     |     |     |
| nethyllidrazine Hydrochloride 2 |     |     |     |     |     |     |
| nethyllidrazine Hydrochloride 3 |     |     |     |     |     |     |
| nethyllidrazine Hydrochloride 4 |     |     |     |     |     |     |
| Phenethyl caffate (CAPE) 1      |     |     |     |     |     |     |
| Phenethyl caffate (CAPE) 2      |     |     |     |     |     |     |
| Phenethyl caffate (CAPE) 3      |     |     |     |     |     |     |
| Phenethyl caffate (CAPE) 4      |     |     |     |     |     |     |
| Camptothecin 1                  |     |     |     |     |     |     |
| Camptothecin 2                  |     |     |     |     |     |     |
| Camptothecin 3                  |     |     |     |     |     |     |
| Camptothecin 4                  |     |     |     |     |     |     |
| Amygdalin 1                     |     |     |     |     |     |     |
| Amygdalin 2                     |     |     |     |     |     |     |
| Amygdalin 3                     |     |     |     |     |     |     |
| Amygdalin 4                     |     |     |     |     |     |     |
| Ellagic Acid 1                  |     |     |     |     |     |     |
| Ellagic Acid 2                  |     |     |     |     |     |     |
| Ellagic Acid 3                  |     |     |     |     |     |     |
| Ellagic Acid 4                  |     |     |     |     |     |     |

| M13                                 | PAR | SBN | PAR | ALK | ALK | SBN |
|-------------------------------------|-----|-----|-----|-----|-----|-----|
| Negative Control 1                  |     |     |     |     |     |     |
| Negative Control 2                  |     |     |     |     |     |     |
| Negative Control 3                  |     |     |     |     |     |     |
| Negative Control 4                  |     |     |     |     |     |     |
| Monocrotaline 1                     |     |     |     |     |     |     |
| Monocrotaline 2                     |     |     |     |     |     |     |
| Monocrotaline 3                     |     |     |     |     |     |     |
| Monocrotaline 4                     |     |     |     |     |     |     |
| Altretramine 1                      |     |     |     |     |     |     |
| Altretramine 2                      |     |     |     |     |     |     |
| Altretramine 3                      |     |     |     |     |     |     |
| Altretramine 4                      |     |     |     |     |     |     |
| Carmustine 1                        |     |     |     |     |     |     |
| Carmustine 2                        |     |     |     |     |     |     |
| Carmustine 3                        |     |     |     |     |     |     |
| Carmustine 4                        |     |     |     |     |     |     |
| Mitoxantrone Hydrochloride 1        |     |     |     |     |     |     |
| Mitoxantrone Hydrochloride 2        |     |     |     |     |     |     |
| Mitoxantrone Hydrochloride 3        |     |     |     |     |     |     |
| Mitoxantrone Hydrochloride 4        |     |     |     |     |     |     |
| Urethane 1                          |     |     |     |     |     |     |
| Urethane 2                          |     |     |     |     |     |     |
| Urethane 3                          |     |     |     |     |     |     |
| Urethane 4                          |     |     |     |     |     |     |
| Thiotepe 1                          |     |     |     |     |     |     |
| Thiotepe 2                          |     |     |     |     |     |     |
| Thiotepe 3                          |     |     |     |     |     |     |
| Thiotepe 4                          |     |     |     |     |     |     |
| Thiodiglycol 1                      |     |     |     |     |     |     |
| Thiodiglycol 2                      |     |     |     |     |     |     |
| Thiodiglycol 3                      |     |     |     |     |     |     |
| Thiodiglycol 4                      |     |     |     |     |     |     |
| Pipobroman 1                        |     |     |     |     |     |     |
| Pipobroman 2                        |     |     |     |     |     |     |
| Pipobroman 3                        |     |     |     |     |     |     |
| Pipobroman 4                        |     |     |     |     |     |     |
| Etanidazole 1                       |     |     |     |     |     |     |
| Etanidazole 2                       |     |     |     |     |     |     |
| Etanidazole 3                       |     |     |     |     |     |     |
| Etanidazole 4                       |     |     |     |     |     |     |
| Semustine 1                         |     |     |     |     |     |     |
| Semustine 2                         |     |     |     |     |     |     |
| Semustine 3                         |     |     |     |     |     |     |
| Semustine 4                         |     |     |     |     |     |     |
| Gossypol 1                          |     |     |     |     |     |     |
| Gossypol 2                          |     |     |     |     |     |     |
| Gossypol 3                          |     |     |     |     |     |     |
| Gossypol 4                          |     |     |     |     |     |     |
| Formestane 1                        |     |     |     |     |     |     |
| Formestane 2                        |     |     |     |     |     |     |
| Formestane 3                        |     |     |     |     |     |     |
| Formestane 4                        |     |     |     |     |     |     |
| Anticabine Hydrochloride 1          |     |     |     |     |     |     |
| Anticabine Hydrochloride 2          |     |     |     |     |     |     |
| Anticabine Hydrochloride 3          |     |     |     |     |     |     |
| Anticabine Hydrochloride 4          |     |     |     |     |     |     |
| Nimustine 1                         |     |     |     |     |     |     |
| Nimustine 2                         |     |     |     |     |     |     |
| Nimustine 3                         |     |     |     |     |     |     |
| Nimustine 4                         |     |     |     |     |     |     |
| Aminolevulinic Acid Hydrochloride 1 |     |     |     |     |     |     |
| Aminolevulinic Acid Hydrochloride 2 |     |     |     |     |     |     |
| Aminolevulinic Acid Hydrochloride 3 |     |     |     |     |     |     |
| Aminolevulinic Acid Hydrochloride 4 |     |     |     |     |     |     |
| Picropodophyllotoxin 1              |     |     |     |     |     |     |
| Picropodophyllotoxin 2              |     |     |     |     |     |     |
| Picropodophyllotoxin 3              |     |     |     |     |     |     |
| Picropodophyllotoxin 4              |     |     |     |     |     |     |
| 8-Peltatin 1                        |     |     |     |     |     |     |
| 8-Peltatin 2                        |     |     |     |     |     |     |
| 8-Peltatin 3                        |     |     |     |     |     |     |
| 8-Peltatin 4                        |     |     |     |     |     |     |
| Perillyl Alcohol 1                  |     |     |     |     |     |     |
| Perillyl Alcohol 2                  |     |     |     |     |     |     |
| Perillyl Alcohol 3                  |     |     |     |     |     |     |
| Perillyl Alcohol 4                  |     |     |     |     |     |     |
| Dibenzoylmethane 1                  |     |     |     |     |     |     |
| Dibenzoylmethane 2                  |     |     |     |     |     |     |
| Dibenzoylmethane 3                  |     |     |     |     |     |     |
| Dibenzoylmethane 4                  |     |     |     |     |     |     |
| 6-Amino nicotinamide 1              |     |     |     |     |     |     |
| 6-Amino nicotinamide 2              |     |     |     |     |     |     |
| 6-Amino nicotinamide 3              |     |     |     |     |     |     |
| 6-Amino nicotinamide 4              |     |     |     |     |     |     |
| Carmofur 1                          |     |     |     |     |     |     |
| Carmofur 2                          |     |     |     |     |     |     |
| Carmofur 3                          |     |     |     |     |     |     |
| Carmofur 4                          |     |     |     |     |     |     |
| Indole-3-Carbinol 1                 |     |     |     |     |     |     |
| Indole-3-Carbinol 2                 |     |     |     |     |     |     |
| Indole-3-Carbinol 3                 |     |     |     |     |     |     |
| Indole-3-Carbinol 4                 |     |     |     |     |     |     |
| Rifaximin 1                         |     |     |     |     |     |     |
| Rifaximin 2                         |     |     |     |     |     |     |
| Rifaximin 3                         |     |     |     |     |     |     |
| Rifaximin 4                         |     |     |     |     |     |     |

|  | PAR | SBN | PAR | ALK | ALK | SBN |
|--|-----|-----|-----|-----|-----|-----|
|  |     |     |     |     |     |     |
|  |     |     |     |     |     |     |
|  |     |     |     |     |     |     |
|  |     |     |     |     |     |     |
|  |     |     |     |     |     |     |
|  |     |     |     |     |     |     |
|  |     |     |     |     |     |     |
|  |     |     |     |     |     |     |
|  |     |     |     |     |     |     |
|  |     |     |     |     |     |     |
|  |     |     |     |     |     |     |
|  |     |     |     |     |     |     |
|  |     |     |     |     |     |     |
|  |     |     |     |     |     |     |
|  |     |     |     |     |     |     |
|  |     |     |     |     |     |     |
|  |     |     |     |     |     |     |
|  |     |     |     |     |     |     |
|  |     |     |     |     |     |     |
|  |     |     |     |     |     |     |
|  |     |     |     |     |     |     |
|  |     |     |     |     |     |     |
|  |     |     |     |     |     |     |
|  |     |     |     |     |     |     |
|  |     |     |     |     |     |     |
|  |     |     |     |     |     |     |
|  |     |     |     |     |     |     |
|  |     |     |     |     |     |     |
|  |     |     |     |     |     |     |
|  |     |     |     |     |     |     |
|  |     |     |     |     |     |     |
|  |     |     |     |     |     |     |
|  |     |     |     |     |     |     |
|  |     |     |     |     |     |     |
|  |     |     |     |     |     |     |
|  |     |     |     |     |     |     |
|  |     |     |     |     |     |     |
|  |     |     |     |     |     |     |
|  |     |     |     |     |     |     |
|  |     |     |     |     |     |     |
|  |     |     |     |     |     |     |
|  |     |     |     |     |     |     |
|  |     |     |     |     |     |     |
|  |     |     |     |     |     |     |
|  |     |     |     |     |     |     |
|  |     |     |     |     |     |     |
|  |     |     |     |     |     |     |
|  |     |     |     |     |     |     |
|  |     |     |     |     |     |     |
|  |     |     |     |     |     |     |
|  |     |     |     |     |     |     |
|  |     |     |     |     |     |     |
|  |     |     |     |     |     |     |
|  |     |     |     |     |     |     |
|  |     |     |     |     |     |     |
|  |     |     |     |     |     |     |
|  |     |     |     |     |     |     |
|  |     |     |     |     |     |     |
|  |     |     |     |     |     |     |
|  |     |     |     |     |     |     |
|  |     |     |     |     |     |     |
|  |     |     |     |     |     |     |
|  |     |     |     |     |     |     |
|  |     |     |     |     |     |     |
|  |     |     |     |     |     |     |
|  |     |     |     |     |     |     |
|  |     |     |     |     |     |     |
|  |     |     |     |     |     |     |
|  |     |     |     |     |     |     |
|  |     |     |     |     |     |     |
|  |     |     |     |     |     |     |
|  |     |     |     |     |     |     |
|  |     |     |     |     |     |     |
|  |     |     |     |     |     |     |
|  |     |     |     |     |     |     |
|  |     |     |     |     |     |     |
|  |     |     |     |     |     |     |
|  |     |     |     |     |     |     |
|  |     |     |     |     |     |     |
|  |     |     |     |     |     |     |
|  |     |     |     |     |     |     |
|  |     |     |     |     |     |     |
|  |     |     |     |     |     |     |
|  |     |     |     |     |     |     |
|  |     |     |     |     |     |     |
|  |     |     |     |     |     |     |
|  |     |     |     |     |     |     |
|  |     |     |     |     |     |     |
|  |     |     |     |     |     |     |
|  |     |     |     |     |     |     |
|  |     |     |     |     |     |     |
|  |     |     |     |     |     |     |
|  |     |     |     |     |     |     |
|  |     |     |     |     |     |     |
|  |     |     |     |     |     |     |
|  |     |     |     |     |     |     |
|  |     |     |     |     |     |     |
|  |     |     |     |     |     |     |
|  |     |     |     |     |     |     |
|  |     |     |     |     |     |     |
|  |     |     |     |     |     |     |
|  |     |     |     |     |     |     |
|  |     |     |     |     |     |     |
|  |     |     |     |     |     |     |
|  |     |     |     |     |     |     |
|  |     |     |     |     |     |     |
|  |     |     |     |     |     |     |
|  |     |     |     |     |     |     |
|  |     |     |     |     |     |     |
|  |     |     |     |     |     |     |
|  |     |     |     |     |     |     |
|  |     |     |     |     |     |     |
|  |     |     |     |     |     |     |
|  |     |     |     |     |     |     |
|  |     |     |     |     |     |     |
|  |     |     |     |     |     |     |
|  |     |     |     |     |     |     |
|  |     |     |     |     |     |     |
|  |     |     |     |     |     |     |
|  |     |     |     |     |     |     |
|  |     |     |     |     |     |     |
|  |     |     |     |     |     |     |
|  |     |     |     |     |     |     |
|  |     |     |     |     |     |     |
|  |     |     |     |     |     |     |
|  |     |     |     |     |     |     |
|  |     |     |     |     |     |     |
|  |     |     |     |     |     |     |
|  |     |     |     |     |     |     |
|  |     |     |     |     |     |     |
|  |     |     |     |     |     |     |
|  |     |     |     |     |     |     |
|  |     |     |     |     |     |     |
|  |     |     |     |     |     |     |
|  |     |     |     |     |     |     |
|  |     |     |     |     |     |     |
|  |     |     |     |     |     |     |
|  |     |     |     |     |     |     |
|  |     |     |     |     |     |     |
|  |     |     |     |     |     |     |
|  |     |     |     |     |     |     |
|  |     |     |     |     |     |     |
|  |     |     |     |     |     |     |
|  |     |     |     |     |     |     |
|  |     |     |     |     |     |     |
|  |     |     |     |     |     |     |
|  |     |     |     |     |     |     |
|  |     |     |     |     |     |     |
|  |     |     |     |     |     |     |
|  |     |     |     |     |     |     |
|  |     |     |     |     |     |     |
|  |     |     |     |     |     |     |
|  |     |     |     |     |     |     |
|  |     |     |     |     |     |     |
|  |     |     |     |     |     |     |
|  |     |     |     |     |     |     |
|  |     |     |     |     |     |     |
|  |     |     |     |     |     |     |
|  |     |     |     |     |     |     |
|  |     |     |     |     |     |     |
|  |     |     |     |     |     |     |
|  |     |     |     |     |     |     |
|  |     |     |     |     |     |     |
|  |     |     |     |     |     |     |
|  |     |     |     |     |     |     |
|  |     |     |     |     |     |     |
|  |     |     |     |     |     |     |
|  |     |     |     |     |     |     |
|  |     |     |     |     |     |     |
|  |     |     |     |     |     |     |
|  |     |     |     |     |     |     |
|  |     |     |     |     |     |     |
|  |     |     |     |     |     |     |
|  |     |     |     |     |     |     |
|  |     |     |     |     |     |     |
|  |     |     |     |     |     |     |
|  |     |     |     |     |     |     |
|  |     |     |     |     |     |     |
|  |     |     |     |     |     |     |
|  |     |     |     |     |     |     |
|  |     |     |     |     |     |     |
|  |     |     |     |     |     |     |
|  |     |     |     |     |     |     |
|  |     |     |     |     |     |     |
|  |     |     |     |     |     |     |
|  |     |     |     |     |     |     |
|  |     |     |     |     |     |     |

**Figure S2.** (a) Original uncropped immunoblots for Figure 4. (b) Original raw data of the phenotypic microarray system analyzed in Figure 4.

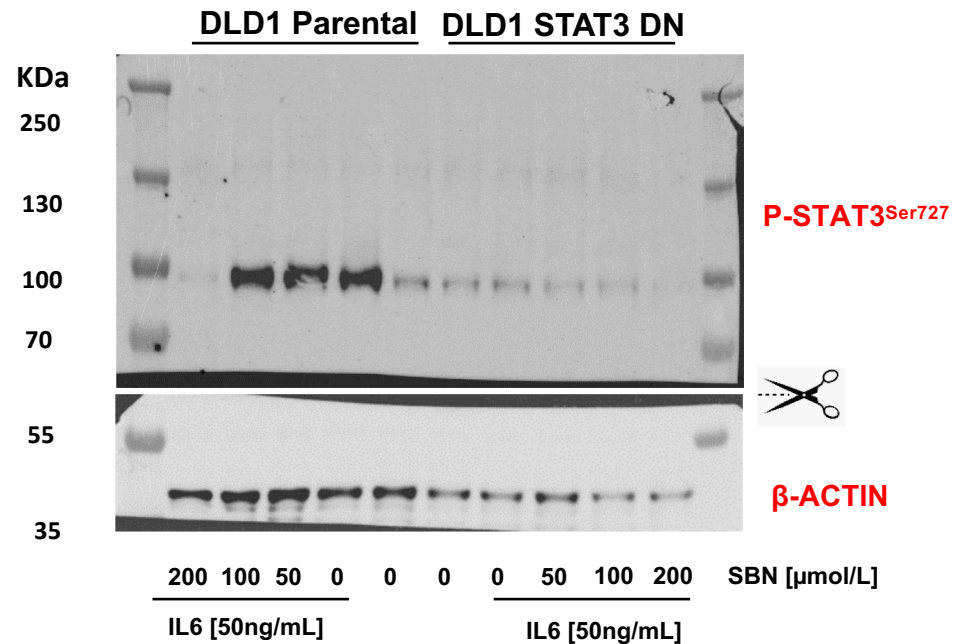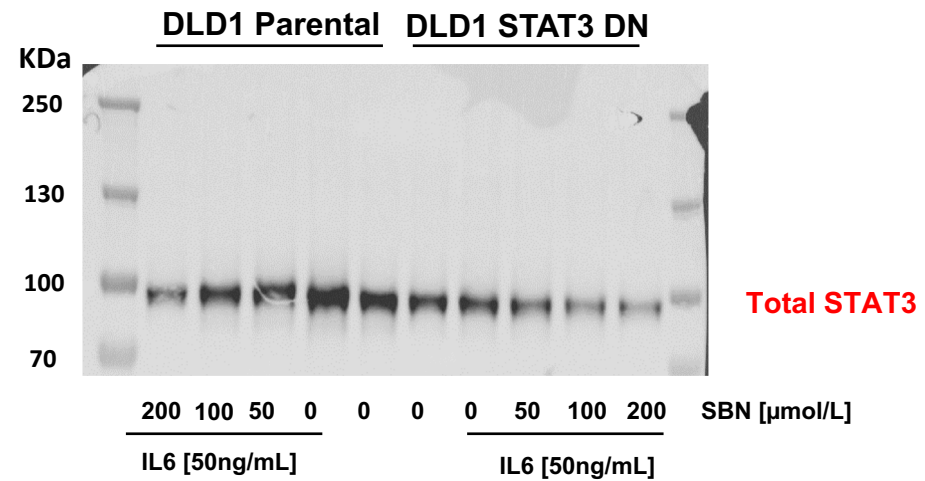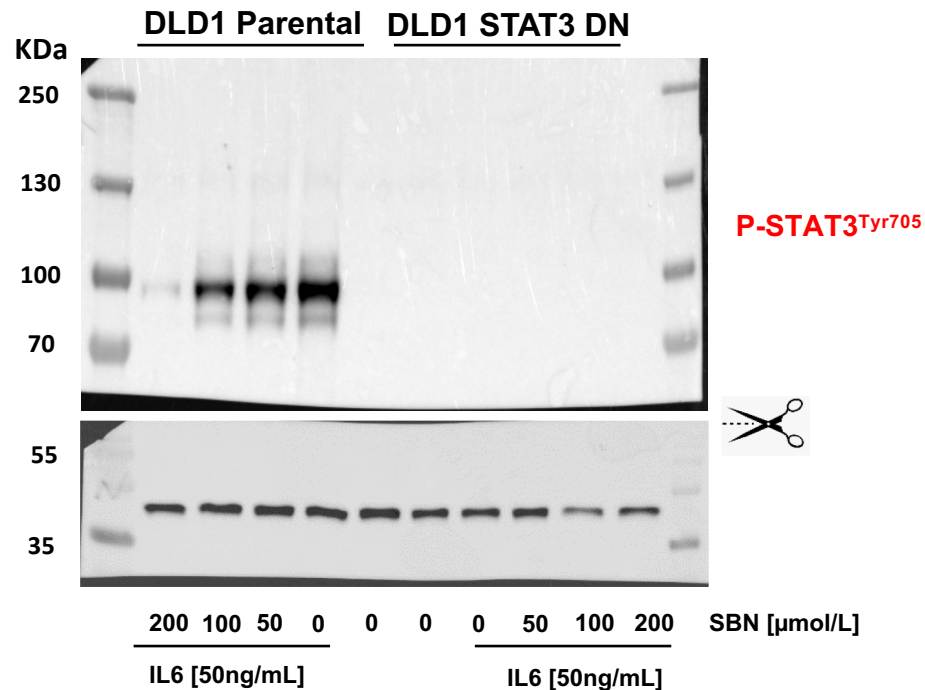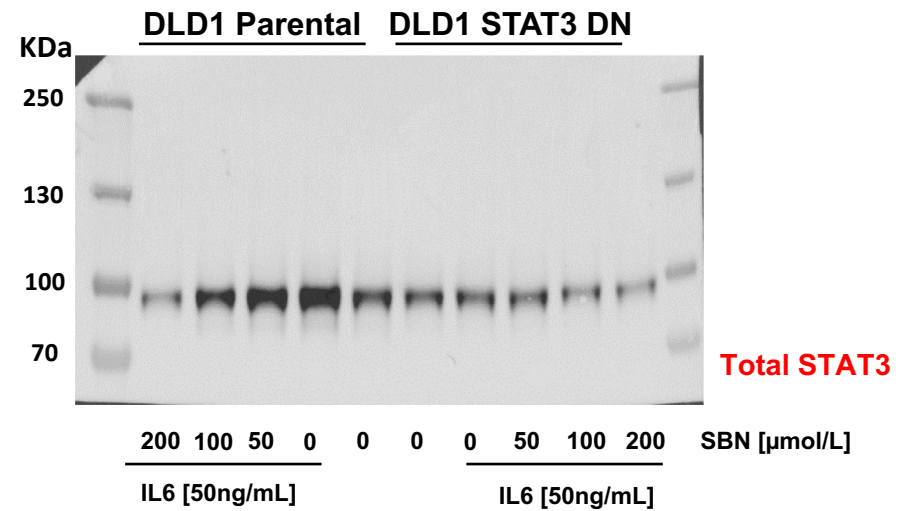

(a)

(b)

|                              | M11 | PAR SBN | PAR | DN | DN SBN |
|------------------------------|-----|---------|-----|----|--------|
| Negative Control 1           |     |         |     |    |        |
| Negative Control 2           |     |         |     |    |        |
| Negative Control 3           |     |         |     |    |        |
| Negative Control 4           |     |         |     |    |        |
| Solasodine 1                 |     |         |     |    |        |
| Solasodine 2                 |     |         |     |    |        |
| Solasodine 3                 |     |         |     |    |        |
| Solasodine 4                 |     |         |     |    |        |
| Rotenone 1                   |     |         |     |    |        |
| Rotenone 2                   |     |         |     |    |        |
| Rotenone 3                   |     |         |     |    |        |
| Rotenone 4                   |     |         |     |    |        |
| Aklavine Hydrochloride 1     |     |         |     |    |        |
| Aklavine Hydrochloride 2     |     |         |     |    |        |
| Aklavine Hydrochloride 3     |     |         |     |    |        |
| Aklavine Hydrochloride 4     |     |         |     |    |        |
| Deguelin(-) 1                |     |         |     |    |        |
| Deguelin(-) 2                |     |         |     |    |        |
| Deguelin(-) 3                |     |         |     |    |        |
| Deguelin(-) 4                |     |         |     |    |        |
| Celastrol 1                  |     |         |     |    |        |
| Celastrol 2                  |     |         |     |    |        |
| Celastrol 3                  |     |         |     |    |        |
| Celastrol 4                  |     |         |     |    |        |
| Juglone 1                    |     |         |     |    |        |
| Juglone 2                    |     |         |     |    |        |
| Juglone 3                    |     |         |     |    |        |
| Juglone 4                    |     |         |     |    |        |
| Sanguinarine Sulfate 1       |     |         |     |    |        |
| Sanguinarine Sulfate 2       |     |         |     |    |        |
| Sanguinarine Sulfate 3       |     |         |     |    |        |
| Sanguinarine Sulfate 4       |     |         |     |    |        |
| Actinomycin D 1              |     |         |     |    |        |
| Actinomycin D 2              |     |         |     |    |        |
| Actinomycin D 3              |     |         |     |    |        |
| Actinomycin D 4              |     |         |     |    |        |
| Methylmethane Sulfonate 1    |     |         |     |    |        |
| Methylmethane Sulfonate 2    |     |         |     |    |        |
| Methylmethane Sulfonate 3    |     |         |     |    |        |
| Methylmethane Sulfonate 4    |     |         |     |    |        |
| Azathioprine 1               |     |         |     |    |        |
| Azathioprine 2               |     |         |     |    |        |
| Azathioprine 3               |     |         |     |    |        |
| Azathioprine 4               |     |         |     |    |        |
| Busulfan 1                   |     |         |     |    |        |
| Busulfan 2                   |     |         |     |    |        |
| Busulfan 3                   |     |         |     |    |        |
| Busulfan 4                   |     |         |     |    |        |
| Aclarubicin 1                |     |         |     |    |        |
| Aclarubicin 2                |     |         |     |    |        |
| Aclarubicin 3                |     |         |     |    |        |
| Aclarubicin 4                |     |         |     |    |        |
| Chloramphenicol 1            |     |         |     |    |        |
| Chloramphenicol 2            |     |         |     |    |        |
| Chloramphenicol 3            |     |         |     |    |        |
| Chloramphenicol 4            |     |         |     |    |        |
| Chloroquine Diphosphate 1    |     |         |     |    |        |
| Chloroquine Diphosphate 2    |     |         |     |    |        |
| Chloroquine Diphosphate 3    |     |         |     |    |        |
| Chloroquine Diphosphate 4    |     |         |     |    |        |
| Cyclophosphamide 1           |     |         |     |    |        |
| Cyclophosphamide 2           |     |         |     |    |        |
| Cyclophosphamide 3           |     |         |     |    |        |
| Cyclophosphamide 4           |     |         |     |    |        |
| Diethylcarbamazine Citrate 1 |     |         |     |    |        |
| Diethylcarbamazine Citrate 2 |     |         |     |    |        |
| Diethylcarbamazine Citrate 3 |     |         |     |    |        |
| Diethylcarbamazine Citrate 4 |     |         |     |    |        |
| Emetine 1                    |     |         |     |    |        |
| Emetine 2                    |     |         |     |    |        |
| Emetine 3                    |     |         |     |    |        |
| Emetine 4                    |     |         |     |    |        |
| Fluorouracil 1               |     |         |     |    |        |
| Fluorouracil 2               |     |         |     |    |        |
| Fluorouracil 3               |     |         |     |    |        |
| Fluorouracil 4               |     |         |     |    |        |
| Hydroxyurea 1                |     |         |     |    |        |
| Hydroxyurea 2                |     |         |     |    |        |
| Hydroxyurea 3                |     |         |     |    |        |
| Hydroxyurea 4                |     |         |     |    |        |
| Mechlorethamine 1            |     |         |     |    |        |
| Mechlorethamine 2            |     |         |     |    |        |
| Mechlorethamine 3            |     |         |     |    |        |
| Mechlorethamine 4            |     |         |     |    |        |
| Mercaptopurine 1             |     |         |     |    |        |
| Mercaptopurine 2             |     |         |     |    |        |
| Mercaptopurine 3             |     |         |     |    |        |
| Mercaptopurine 4             |     |         |     |    |        |
| Quinacrine Hydrochloride 1   |     |         |     |    |        |
| Quinacrine Hydrochloride 2   |     |         |     |    |        |
| Quinacrine Hydrochloride 3   |     |         |     |    |        |
| Quinacrine Hydrochloride 4   |     |         |     |    |        |
| Streptozosin 1               |     |         |     |    |        |
| Streptozosin 2               |     |         |     |    |        |
| Streptozosin 3               |     |         |     |    |        |
| Streptozosin 4               |     |         |     |    |        |

|                                 | M12 | PAR SBN | PAR | DN | DN SBN |
|---------------------------------|-----|---------|-----|----|--------|
| Negative Control 1              |     |         |     |    |        |
| Negative Control 2              |     |         |     |    |        |
| Negative Control 3              |     |         |     |    |        |
| Negative Control 4              |     |         |     |    |        |
| Tamoxifen Citrate 1             |     |         |     |    |        |
| Tamoxifen Citrate 2             |     |         |     |    |        |
| Tamoxifen Citrate 3             |     |         |     |    |        |
| Tamoxifen Citrate 4             |     |         |     |    |        |
| Thioguanine 1                   |     |         |     |    |        |
| Thioguanine 2                   |     |         |     |    |        |
| Thioguanine 3                   |     |         |     |    |        |
| Thioguanine 4                   |     |         |     |    |        |
| Acriflavium Hydrochloride 1     |     |         |     |    |        |
| Acriflavium Hydrochloride 2     |     |         |     |    |        |
| Acriflavium Hydrochloride 3     |     |         |     |    |        |
| Acriflavium Hydrochloride 4     |     |         |     |    |        |
| Pentamidine Isethionate 1       |     |         |     |    |        |
| Pentamidine Isethionate 2       |     |         |     |    |        |
| Pentamidine Isethionate 3       |     |         |     |    |        |
| Pentamidine Isethionate 4       |     |         |     |    |        |
| Mycophenolic Acid 1             |     |         |     |    |        |
| Mycophenolic Acid 2             |     |         |     |    |        |
| Mycophenolic Acid 3             |     |         |     |    |        |
| Mycophenolic Acid 4             |     |         |     |    |        |
| Aminopterin 1                   |     |         |     |    |        |
| Aminopterin 2                   |     |         |     |    |        |
| Aminopterin 3                   |     |         |     |    |        |
| Aminopterin 4                   |     |         |     |    |        |
| Berberine Chloride 1            |     |         |     |    |        |
| Berberine Chloride 2            |     |         |     |    |        |
| Berberine Chloride 3            |     |         |     |    |        |
| Berberine Chloride 4            |     |         |     |    |        |
| Emodin 1                        |     |         |     |    |        |
| Emodin 2                        |     |         |     |    |        |
| Emodin 3                        |     |         |     |    |        |
| Emodin 4                        |     |         |     |    |        |
| Puromycin Hydrochloride 1       |     |         |     |    |        |
| Puromycin Hydrochloride 2       |     |         |     |    |        |
| Puromycin Hydrochloride 3       |     |         |     |    |        |
| Puromycin Hydrochloride 4       |     |         |     |    |        |
| Nerifolin 1                     |     |         |     |    |        |
| Nerifolin 2                     |     |         |     |    |        |
| Nerifolin 3                     |     |         |     |    |        |
| Nerifolin 4                     |     |         |     |    |        |
| 5-Fluoro-5'-Deoxyuridine 1      |     |         |     |    |        |
| 5-Fluoro-5'-Deoxyuridine 2      |     |         |     |    |        |
| 5-Fluoro-5'-Deoxyuridine 3      |     |         |     |    |        |
| 5-Fluoro-5'-Deoxyuridine 4      |     |         |     |    |        |
| Carboplatin 1                   |     |         |     |    |        |
| Carboplatin 2                   |     |         |     |    |        |
| Carboplatin 3                   |     |         |     |    |        |
| Carboplatin 4                   |     |         |     |    |        |
| Cisplatin 1                     |     |         |     |    |        |
| Cisplatin 2                     |     |         |     |    |        |
| Cisplatin 3                     |     |         |     |    |        |
| Cisplatin 4                     |     |         |     |    |        |
| Zidovudine (AZT) 1              |     |         |     |    |        |
| Zidovudine (AZT) 2              |     |         |     |    |        |
| Zidovudine (AZT) 3              |     |         |     |    |        |
| Zidovudine (AZT) 4              |     |         |     |    |        |
| Azacytidine 1                   |     |         |     |    |        |
| Azacytidine 2                   |     |         |     |    |        |
| Azacytidine 3                   |     |         |     |    |        |
| Azacytidine 4                   |     |         |     |    |        |
| Cycloheximide 1                 |     |         |     |    |        |
| Cycloheximide 2                 |     |         |     |    |        |
| Cycloheximide 3                 |     |         |     |    |        |
| Cycloheximide 4                 |     |         |     |    |        |
| Azaserine 1                     |     |         |     |    |        |
| Azaserine 2                     |     |         |     |    |        |
| Azaserine 3                     |     |         |     |    |        |
| Azaserine 4                     |     |         |     |    |        |
| p-Fluorophenylalanine 1         |     |         |     |    |        |
| p-Fluorophenylalanine 2         |     |         |     |    |        |
| p-Fluorophenylalanine 3         |     |         |     |    |        |
| p-Fluorophenylalanine 4         |     |         |     |    |        |
| methylhydrazine Hydrochloride 1 |     |         |     |    |        |
| methylhydrazine Hydrochloride 2 |     |         |     |    |        |
| methylhydrazine Hydrochloride 3 |     |         |     |    |        |
| methylhydrazine Hydrochloride 4 |     |         |     |    |        |
| Phenethyl caffeine (CAPE) 1     |     |         |     |    |        |
| Phenethyl caffeine (CAPE) 2     |     |         |     |    |        |
| Phenethyl caffeine (CAPE) 3     |     |         |     |    |        |
| Phenethyl caffeine (CAPE) 4     |     |         |     |    |        |
| Camptothecin 1                  |     |         |     |    |        |
| Camptothecin 2                  |     |         |     |    |        |
| Camptothecin 3                  |     |         |     |    |        |
| Camptothecin 4                  |     |         |     |    |        |
| Amygdalin 1                     |     |         |     |    |        |
| Amygdalin 2                     |     |         |     |    |        |
| Amygdalin 3                     |     |         |     |    |        |
| Amygdalin 4                     |     |         |     |    |        |
| Ellagic Acid 1                  |     |         |     |    |        |
| Ellagic Acid 2                  |     |         |     |    |        |
| Ellagic Acid 3                  |     |         |     |    |        |
| Ellagic Acid 4                  |     |         |     |    |        |

|                                     | M13 | PAR SBN | PAR | DN | DN SBN |
|-------------------------------------|-----|---------|-----|----|--------|
| Negative Control 1                  |     |         |     |    |        |
| Negative Control 2                  |     |         |     |    |        |
| Negative Control 3                  |     |         |     |    |        |
| Negative Control 4                  |     |         |     |    |        |
| Monocrotaline 1                     |     |         |     |    |        |
| Monocrotaline 2                     |     |         |     |    |        |
| Monocrotaline 3                     |     |         |     |    |        |
| Monocrotaline 4                     |     |         |     |    |        |
| Altretramine 1                      |     |         |     |    |        |
| Altretramine 2                      |     |         |     |    |        |
| Altretramine 3                      |     |         |     |    |        |
| Altretramine 4                      |     |         |     |    |        |
| Carmustine 1                        |     |         |     |    |        |
| Carmustine 2                        |     |         |     |    |        |
| Carmustine 3                        |     |         |     |    |        |
| Carmustine 4                        |     |         |     |    |        |
| Mitoxantrone Hydrochloride 1        |     |         |     |    |        |
| Mitoxantrone Hydrochloride 2        |     |         |     |    |        |
| Mitoxantrone Hydrochloride 3        |     |         |     |    |        |
| Mitoxantrone Hydrochloride 4        |     |         |     |    |        |
| Urethane 1                          |     |         |     |    |        |
| Urethane 2                          |     |         |     |    |        |
| Urethane 3                          |     |         |     |    |        |
| Urethane 4                          |     |         |     |    |        |
| Thiotepa 1                          |     |         |     |    |        |
| Thiotepa 2                          |     |         |     |    |        |
| Thiotepa 3                          |     |         |     |    |        |
| Thiotepa 4                          |     |         |     |    |        |
| Thiodiglycol 1                      |     |         |     |    |        |
| Thiodiglycol 2                      |     |         |     |    |        |
| Thiodiglycol 3                      |     |         |     |    |        |
| Thiodiglycol 4                      |     |         |     |    |        |
| Pipibroman 1                        |     |         |     |    |        |
| Pipibroman 2                        |     |         |     |    |        |
| Pipibroman 3                        |     |         |     |    |        |
| Pipibroman 4                        |     |         |     |    |        |
| Etanidazole 1                       |     |         |     |    |        |
| Etanidazole 2                       |     |         |     |    |        |
| Etanidazole 3                       |     |         |     |    |        |
| Etanidazole 4                       |     |         |     |    |        |
| Semustine 1                         |     |         |     |    |        |
| Semustine 2                         |     |         |     |    |        |
| Semustine 3                         |     |         |     |    |        |
| Semustine 4                         |     |         |     |    |        |
| Gossypol 1                          |     |         |     |    |        |
| Gossypol 2                          |     |         |     |    |        |
| Gossypol 3                          |     |         |     |    |        |
| Gossypol 4                          |     |         |     |    |        |
| Formestane 1                        |     |         |     |    |        |
| Formestane 2                        |     |         |     |    |        |
| Formestane 3                        |     |         |     |    |        |
| Formestane 4                        |     |         |     |    |        |
| Ancitabine Hydrochloride 1          |     |         |     |    |        |
| Ancitabine Hydrochloride 2          |     |         |     |    |        |
| Ancitabine Hydrochloride 3          |     |         |     |    |        |
| Ancitabine Hydrochloride 4          |     |         |     |    |        |
| Nimustine 1                         |     |         |     |    |        |
| Nimustine 2                         |     |         |     |    |        |
| Nimustine 3                         |     |         |     |    |        |
| Nimustine 4                         |     |         |     |    |        |
| Aminolevulinic Acid Hydrochloride 1 |     |         |     |    |        |
| Aminolevulinic Acid Hydrochloride 2 |     |         |     |    |        |
| Aminolevulinic Acid Hydrochloride 3 |     |         |     |    |        |
| Aminolevulinic Acid Hydrochloride 4 |     |         |     |    |        |
| Picropodophyllotoxin 1              |     |         |     |    |        |
| Picropodophyllotoxin 2              |     |         |     |    |        |
| Picropodophyllotoxin 3              |     |         |     |    |        |
| Picropodophyllotoxin 4              |     |         |     |    |        |
| 8-Peltatin 1                        |     |         |     |    |        |
| 8-Peltatin 2                        |     |         |     |    |        |
| 8-Peltatin 3                        |     |         |     |    |        |
| 8-Peltatin 4                        |     |         |     |    |        |
| Perillyl Alcohol 1                  |     |         |     |    |        |
| Perillyl Alcohol 2                  |     |         |     |    |        |
| Perillyl Alcohol 3                  |     |         |     |    |        |
| Perillyl Alcohol 4                  |     |         |     |    |        |
| Dibenzoylmethane 1                  |     |         |     |    |        |
| Dibenzoylmethane 2                  |     |         |     |    |        |
| Dibenzoylmethane 3                  |     |         |     |    |        |
| Dibenzoylmethane 4                  |     |         |     |    |        |
| 6-Amino nicotinamide 1              |     |         |     |    |        |
| 6-Amino nicotinamide 2              |     |         |     |    |        |
| 6-Amino nicotinamide 3              |     |         |     |    |        |
| 6-Amino nicotinamide 4              |     |         |     |    |        |
| Carmofur 1                          |     |         |     |    |        |
| Carmofur 2                          |     |         |     |    |        |
| Carmofur 3                          |     |         |     |    |        |
| Carmofur 4                          |     |         |     |    |        |
| Indole-3-Carbinol 1                 |     |         |     |    |        |
| Indole-3-Carbinol 2                 |     |         |     |    |        |
| Indole-3-Carbinol 3                 |     |         |     |    |        |
| Indole-3-Carbinol 4                 |     |         |     |    |        |
| Rifaximin 1                         |     |         |     |    |        |
| Rifaximin 2                         |     |         |     |    |        |
| Rifaximin 3                         |     |         |     |    |        |
| Rifaximin 4                         |     |         |     |    |        |

|                                  | M14 | PAR SBN    | PAR | DN | DN SBN    |
|----------------------------------|-----|------------|-----|----|-----------|
| Negative Control 1               |     |            |     |    |           |
| Negative Control 2               |     |            |     |    | 0.976571  |
| Negative Control 3               |     |            |     |    | 0.976571  |
| Negative Control 4               |     |            |     |    |           |
| Cepharranthine 1                 |     |            |     |    |           |
| Cepharranthine 2                 |     |            |     |    |           |
| Cepharranthine 3                 |     |            |     |    |           |
| Cepharranthine 4                 |     |            |     |    | 0.7654923 |
| 4'-Demethyl epipodophyllotoxin 1 |     |            |     |    | 0.9911712 |
| 4'-Demethyl epipodophyllotoxin 2 |     |            |     |    |           |
| 4'-Demethyl epipodophyllotoxin 3 |     |            |     |    |           |
| 4'-Demethyl epipodophyllotoxin 4 |     |            |     |    | 0.9911712 |
| Miltefosine 1                    |     |            |     |    |           |
| Miltefosine 2                    |     |            |     |    |           |
| Miltefosine 3                    |     |            |     |    | 0.9911712 |
| Miltefosine 4                    |     | 0.9294961  |     |    | 0.9911712 |
| Elaidyl phosphocholine 1         |     | 0.976571   |     |    |           |
| Elaidyl phosphocholine 2         |     |            |     |    | 0.9911712 |
| Elaidyl phosphocholine 3         |     | 0.976571   |     |    | 0.9911712 |
| Elaidyl phosphocholine 4         |     | 0.976571   |     |    | 0.9211712 |
| Podofilox 1                      |     |            |     |    |           |
| Podofilox 2                      |     |            |     |    |           |
| Podofilox 3                      |     | 0.976571   |     |    |           |
| Podofilox 4                      |     |            |     |    |           |
| Colchicine 1                     |     |            |     |    | 0.9911712 |
| Colchicine 2                     |     |            |     |    |           |
| Colchicine 3                     |     |            |     |    |           |
| Colchicine 4                     |     |            |     |    |           |
| Methotrexate 1                   |     | 0.9911712  |     |    |           |
| Methotrexate 2                   |     |            |     |    | 0.9911712 |
| Methotrexate 3                   |     | 0.9911712  |     |    |           |
| Methotrexate 4                   |     | 0.9911712  |     |    |           |
| Acicidin 1                       |     |            |     |    | 0.9911712 |
| Acicidin 2                       |     | 0.7715447  |     |    | 0.9397899 |
| Acicidin 3                       |     |            |     |    | 0.9911712 |
| Acicidin 4                       |     | 0.976571   |     |    | 0.6245658 |
| Flouxuridine 1                   |     |            |     |    |           |
| Flouxuridine 2                   |     |            |     |    | 0.9911712 |
| Flouxuridine 3                   |     |            |     |    | 0.7715447 |
| Flouxuridine 4                   |     | 0.976571   |     |    | 0.9911712 |
| Lefunomide 1                     |     |            |     |    | 0.7325815 |
| Lefunomide 2                     |     |            |     |    | 0.7045239 |
| Lefunomide 3                     |     |            |     |    | 0.7325815 |
| Lefunomide 4                     |     |            |     |    | 0.6484454 |
| Rapamycin 1                      |     |            |     |    | 0.6091890 |
| Rapamycin 2                      |     | 0.9911712  |     |    | 0.6995258 |
| Rapamycin 3                      |     | 0.9911712  |     |    | 0.6983492 |
| Rapamycin 4                      |     | 0.44357619 |     |    | 0.5747804 |
| 13-cis Retinoic Acid 1           |     |            |     |    | 0.9911712 |
| 13-cis Retinoic Acid 2           |     |            |     |    | 0.8121068 |
| 13-cis Retinoic Acid 3           |     |            |     |    |           |
| 13-cis Retinoic Acid 4           |     |            |     |    | 0.9911712 |
| All-trans Retinoic Acid 1        |     |            |     |    | 0.8849739 |
| All-trans Retinoic Acid 2        |     |            |     |    | 0.8773997 |
| All-trans Retinoic Acid 3        |     |            |     |    | 0.976571  |
| All-trans Retinoic Acid 4        |     |            |     |    |           |
| Piceatannol 1                    |     |            |     |    | 0.8445978 |
| Piceatannol 2                    |     |            |     |    | 0.9911712 |
| Piceatannol 3                    |     | 0.8116736  |     |    | 0.9911712 |
| Piceatannol 4                    |     | 0.686276   |     |    | 0.7213266 |
| (+)-Catechin 1                   |     | 0.9911712  |     |    | 0.9911712 |
| (+)-Catechin 2                   |     |            |     |    | 0.9911712 |
| (+)-Catechin 3                   |     |            |     |    | 0.9911712 |
| (+)-Catechin 4                   |     |            |     |    | 0.9911712 |
| Mitomycin C1                     |     |            |     |    |           |
| Mitomycin C2                     |     |            |     |    | 0.5501477 |
| Mitomycin C3                     |     | 0.6477031  |     |    | 0.9911712 |
| Mitomycin C4                     |     | 0.9911712  |     |    | 0.6917915 |
| Cytosine-8-Darabinafuranoside 1  |     |            |     |    |           |
| Cytosine-8-Darabinafuranoside 2  |     |            |     |    |           |
| Cytosine-8-Darabinafuranoside 3  |     |            |     |    |           |
| Cytosine-8-Darabinafuranoside 4  |     | 4.5797312  |     |    |           |
| Doxorubicin Hydrochloride 1      |     |            |     |    |           |
| Doxorubicin Hydrochloride 2      |     |            |     |    |           |
| Doxorubicin Hydrochloride 3      |     |            |     |    | 0.6985321 |
| Doxorubicin Hydrochloride 4      |     |            |     |    | 2.114036  |
| Doxorubicin Hydrochloride 5      |     |            |     |    |           |
| Doxorubicin Hydrochloride 6      |     | 0.5178259  |     |    | 0.7579322 |
| Doxorubicin Hydrochloride 7      |     |            |     |    | 0.9911712 |
| Etoposide 1                      |     |            |     |    |           |
| Etoposide 2                      |     |            |     |    |           |
| Etoposide 3                      |     |            |     |    |           |
| Etoposide 4                      |     | 0.9292991  |     |    |           |
| Nocodazole 1                     |     | 2.9242199  |     |    |           |
| Nocodazole 2                     |     |            |     |    | 0.9911712 |
| Nocodazole 3                     |     |            |     |    |           |
| Nocodazole 4                     |     | 0.9292991  |     |    | 0.9911712 |
| Quercetin Dihydrate 1            |     |            |     |    |           |
| Quercetin Dihydrate 2            |     | 0.7736623  |     |    | 2.5950226 |
| Quercetin Dihydrate 3            |     | 0.27315682 |     |    | 0.9911712 |
| Quercetin Dihydrate 4            |     |            |     |    |           |
| Vinblastine Sulfate 1            |     |            |     |    | 0.7612493 |
| Vinblastine Sulfate 2            |     |            |     |    | 0.9911712 |
| Vinblastine Sulfate 3            |     |            |     |    |           |
| Vinblastine Sulfate 4            |     |            |     |    |           |
